# Supplementary material for: BaTiO3-g-GO as an efficient permselective material for lithium–sulfur batteries
Source: Royal Society of Chemistry journal article supplement (doi:10.1039/d0qm00716a), 2020-11-27
Supplement: d0qm00716a1.pdf [file d0qm00716a1.pdf]

## Supporting Information

### **BaTiO<sub>3</sub>-g-GO as an efficient permselective material for lithium-sulfur batteries**

Paulina Półrolniczak<sup>1</sup>, Mariusz Walkowiak<sup>1\*</sup>, Justyna Kaźmierczak-Rażna<sup>1</sup>, Dawid Kasprzak<sup>1</sup>, Deepa Elizabeth Mathew<sup>2,3</sup>, M. Kathiresan<sup>2\*</sup>, A. Manuel Stephan<sup>2\*</sup>,  
N. Angulakshmi<sup>1</sup>

<sup>1</sup> *Lukasiewicz Research Network - Institute of Non-Ferrous Metals, Division in Poznań, Central Laboratory of Batteries and Cells, Forteczna 12 St., 61-362 Poznań, Poland.*

<sup>2</sup> *CSIR- Central Electrochemical Research Institute, Karaikudi 630 003, India*

<sup>3</sup> *Academy of Scientific and Innovative Research (AcSIR), Ghaziabad- 201002, India.*

\*Corresponding authors

Tel: +91 4565 241426 Fax: +91 4565 2777

e-mail: amstephan@cecri.res.in,

mariusz.walkowiak@claio.poznan.pl

kathir.org@gmail.com

### **Synthesis of BaTiO<sub>3</sub>-g-GO**

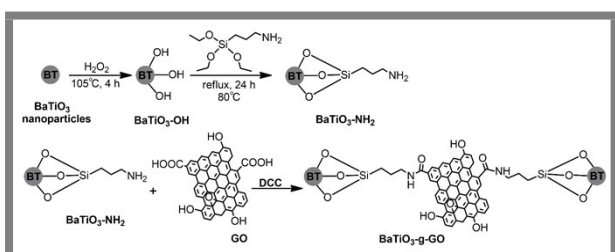

**Figure SI 1a.** Synthesis of BaTiO<sub>3</sub>-g-GO.

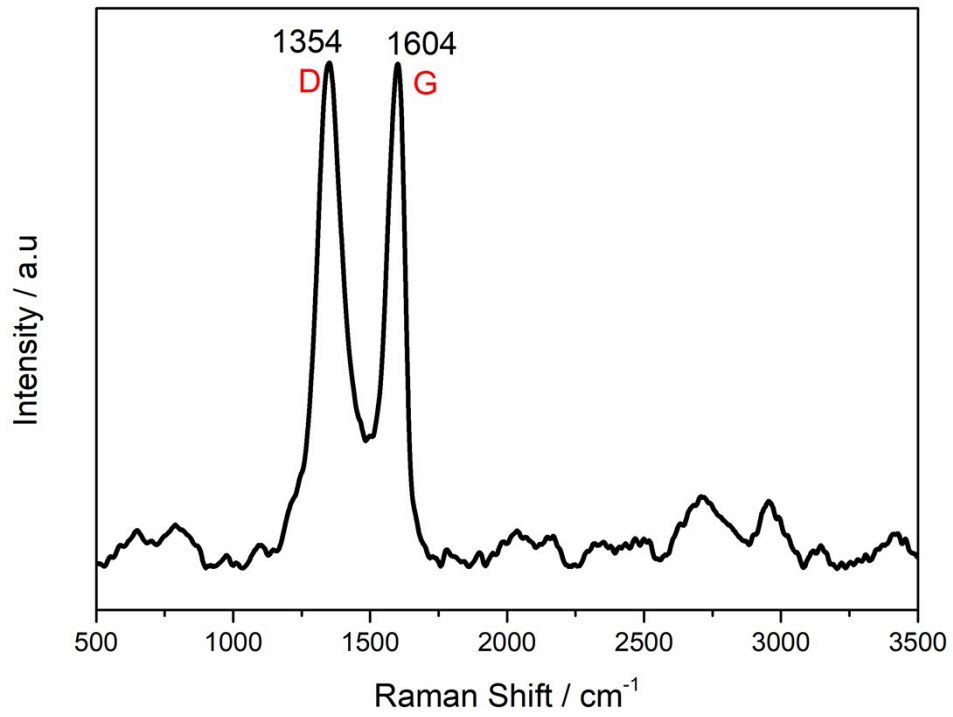

**Figure SI 1b.** Raman spectrum of synthesized Graphene Oxide.

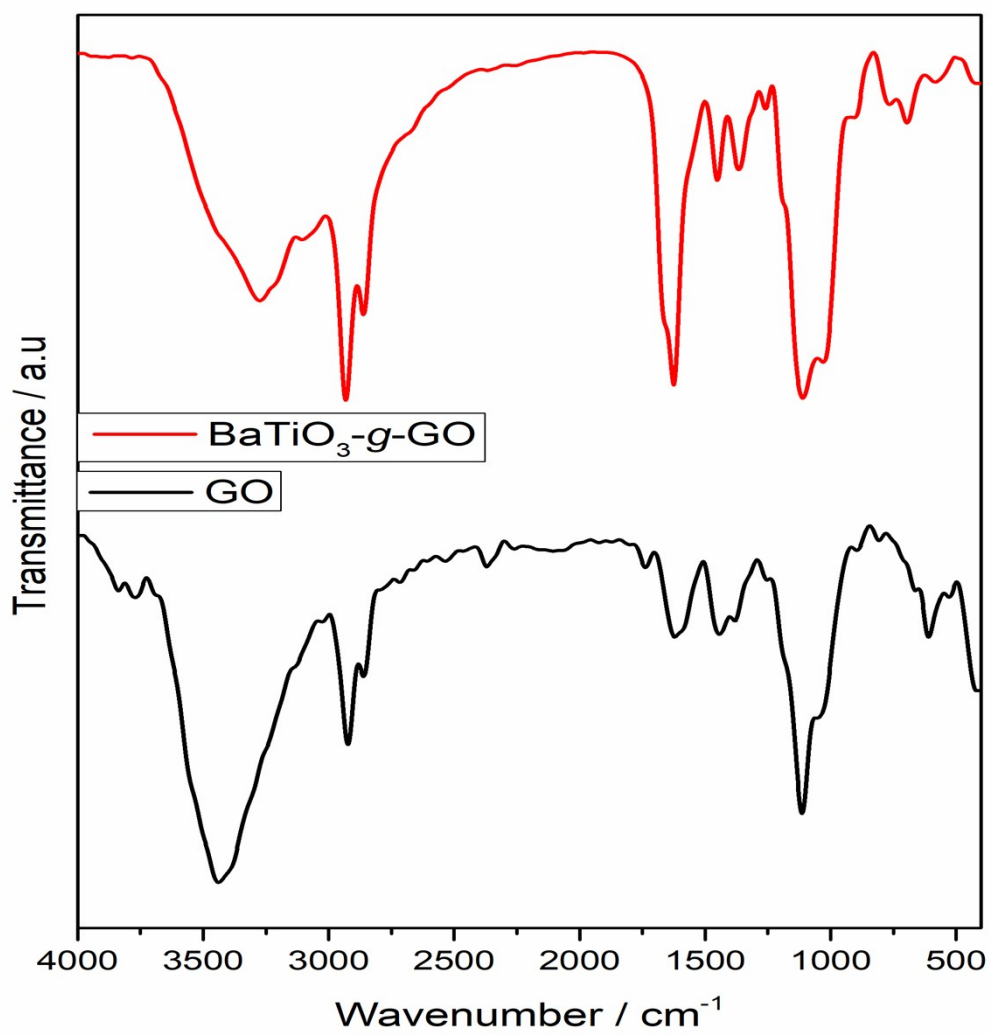

**Figure SI 1c.** The FT-IR spectra of GO and  $\text{BaTiO}_3\text{-g-GO}$

# EDX

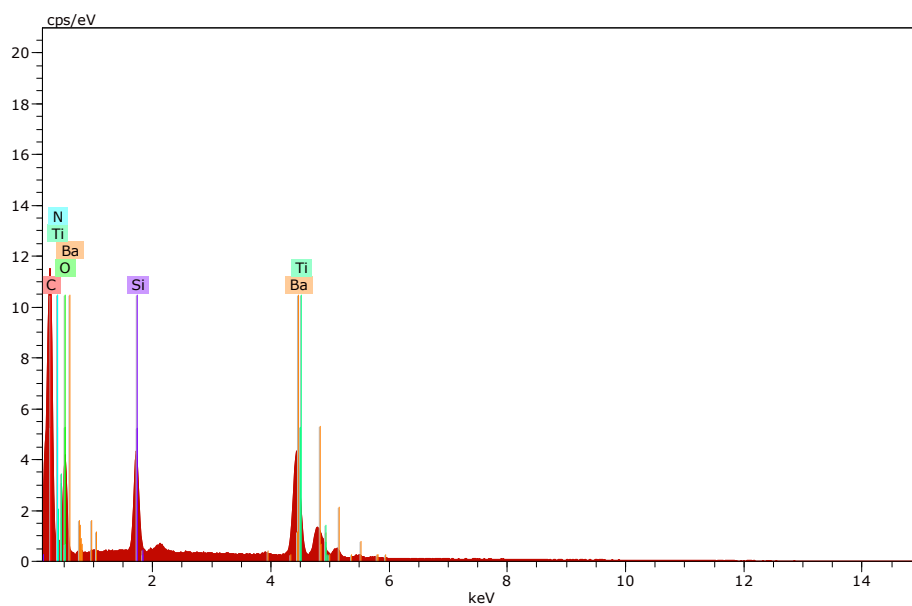

**Figure SI 1d.** EDX spectrum of synthesized BaTiO<sub>3</sub>-g-GO.

Spectrum: Acquisition 9811

El AN Series un. C norm. C Atom. C Error (1 Sigma) K fact. Z corr. A corr. F corr.

|                | [wt.%] | [wt.%] | [at.%] | [wt.%] |       |       |       |  |
|----------------|--------|--------|--------|--------|-------|-------|-------|--|
| Ba 56 L-series | 43.90  | 41.41  | 6.47   | 1.30   | 0.320 | 1.258 | 1.000 |  |
| 1.028          |        |        |        |        |       |       |       |  |
| C 6 K-series   | 42.35  | 39.95  | 71.37  | 4.98   | 0.766 | 0.521 | 1.000 |  |
| 1.000          |        |        |        |        |       |       |       |  |
| O 8 K-series   | 14.53  | 13.71  | 18.38  | 1.92   | 0.165 | 0.829 | 1.000 |  |
| 1.000          |        |        |        |        |       |       |       |  |
| Si 14 K-series | 5.24   | 4.94   | 3.78   | 0.25   | 0.028 | 1.726 | 1.000 |  |
| 1.008          |        |        |        |        |       |       |       |  |
| Ti 22 K-series | 0.00   | 0.00   | 0.00   | 0.00   | 0.000 | 0.000 | 1.000 |  |
| 1.083          |        |        |        |        |       |       |       |  |
| N 7 K-series   | 0.00   | 0.00   | 0.00   | 0.00   | 0.000 | 0.000 | 1.000 |  |
| 1.000          |        |        |        |        |       |       |       |  |
| -----          |        |        |        |        |       |       |       |  |
| Total:         | 106.03 | 100.00 | 100.00 |        |       |       |       |  |

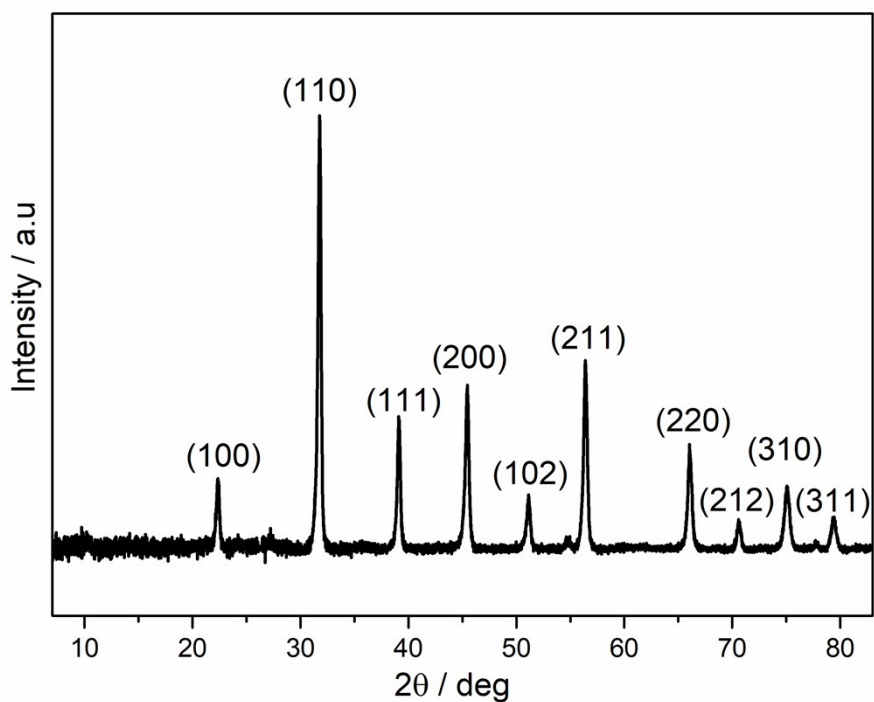

**Figure SI 1e.** XRD spectrum of BaTiO<sub>3</sub>-g-GO

XRD spectrum of BaTiO<sub>3</sub>-g-GO showed characteristic peaks of BaTiO<sub>3</sub>. Since GO constitutes only 0.3 wt%, GO peaks are not visible in XRD. Diffraction peaks for BaTiO<sub>3</sub> nanoparticles were observed at  $2\theta$  22.38°, 31.78°, 39.15°, 45.42°, 51.14°, 56.41°, 66.08°, 70.68°, 75.07°, and 79.42° and these peaks signify the Bragg reflections from the (100), (110), (111), (200), (102), (211), (220), (212), (310), and (311) planes correspondingly.<sup>1</sup> The obtained XRD pattern matches well with the standard XRD pattern of BaTiO<sub>3</sub> particle [JCPDS card no. 79-2264].

## SEM images of Ba-TiO<sub>3</sub>-g-GO

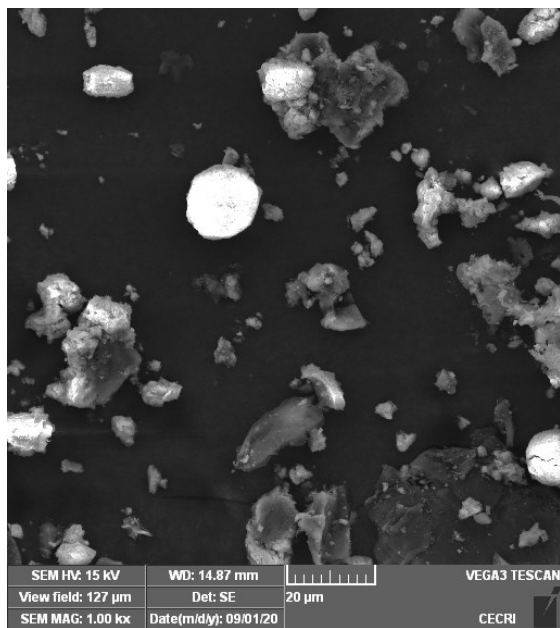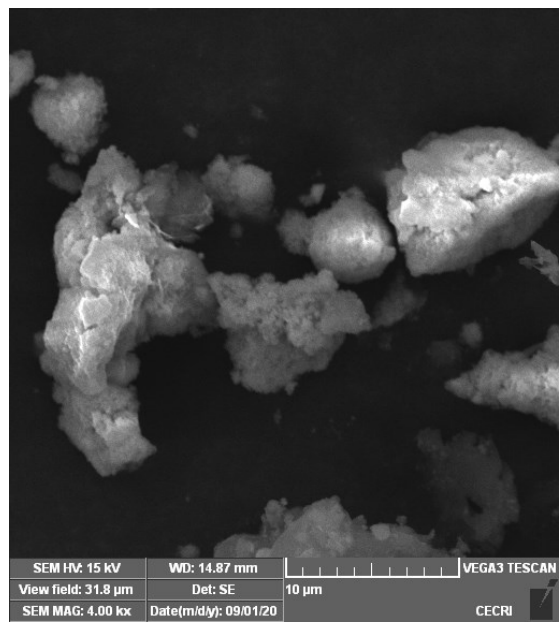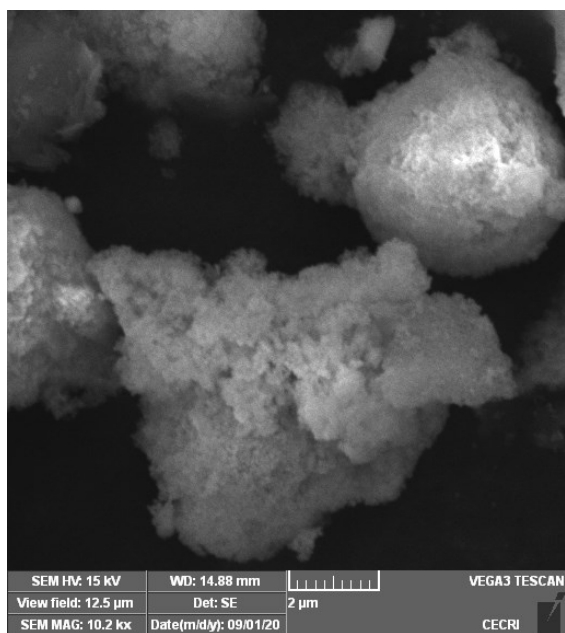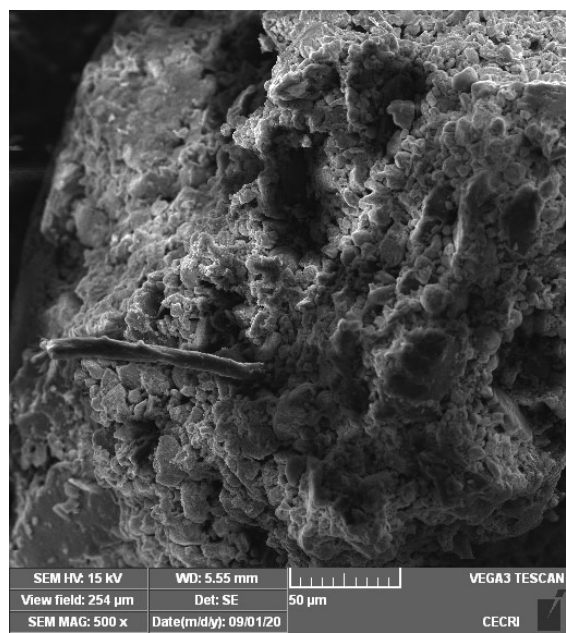

**Figure SI 1f.** SEM images of BaTiO<sub>3</sub>-g-GO at different magnifications

## XPS spectrum of synthesized BaTiO<sub>3</sub>-g-GO

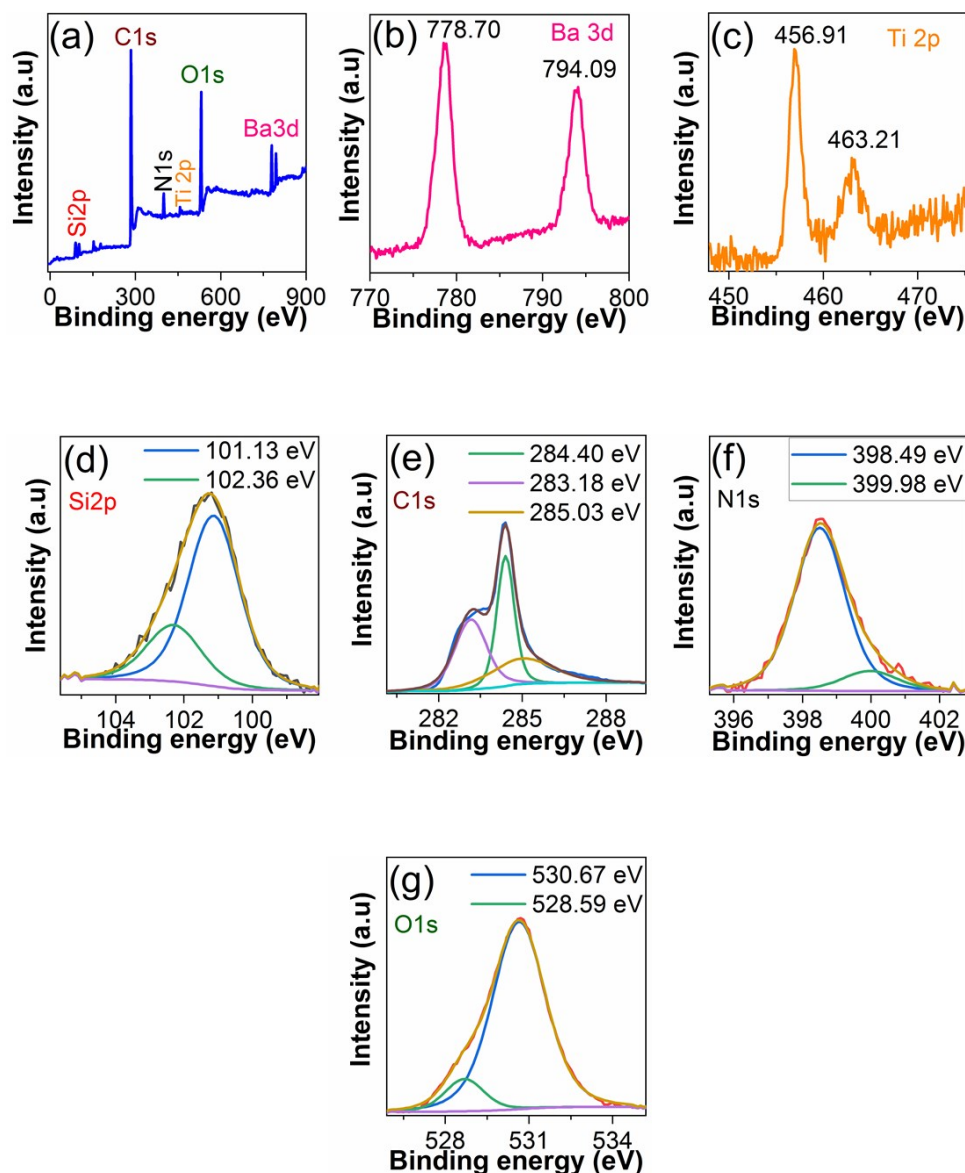

**Figure SI 1g.** XPS spectrum of the as synthesized BaTiO<sub>3</sub>-g-GO a) Survey spectrum, b) Ba 3d spectra, c) Ti 2p spectra, d) Si 2p spectra, e) C 1s spectra, f) N 1s spectra and g) O 1s spectra.

The XPS survey spectrum shows evident peaks of C, O, N, Si, Ba, and Ti (Figure SI 1g-a) indicating the existence of BaTiO<sub>3</sub>, linking APTS, and GO.

- The two peaks at 778.7 and 794.09 eV are ascribed to the splitting of Ba 3d<sub>5/2</sub> and Ba 3d<sub>3/2</sub> spin states correspondingly (Figure SI 1g-b).
- Two bands at 456.91 and 463.21 eV are ascribed to Ti 2p<sub>3/2</sub> and Ti 2p<sub>1/2</sub> respectively.
- Si 101.13, 102.36 eV corresponds to Si-O and SiO<sub>2</sub> respectively.

- C 1s 284.40 eV indicates the presence of C-C/C=C, 283.18 assigned to C-C/C-H and 285.03 eV to presence of C-O bond, all of which corresponds to GO.
- N 1s -398.49 eV attributed to N-H in amine, and 399.98 eV ascribed to N-C single bonds.
- 530.67 eV assigned to C-O bond, and 528.59 eV assigned to oxides (TiO, SiO).

All these results clearly indicate the existence of BaTiO<sub>3</sub>-grafted graphene oxide interconnected via APTES linkage.

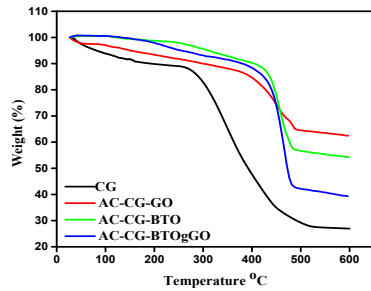

**Figure SI 2.** TG- curves for the coated membrane.

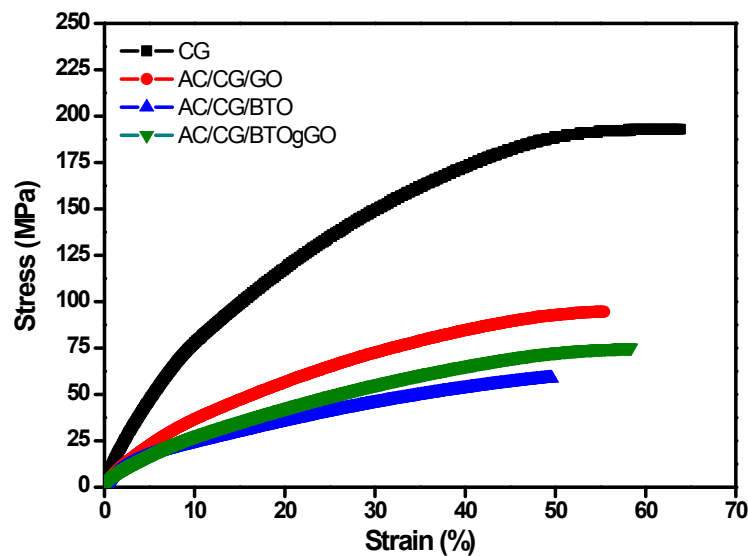

**Figure SI 3.** Stress- strain plot of Celgard 2320, AC/ GO, AC/BTO and AC/ BTO-g-GO coated trilayer membrane separators.



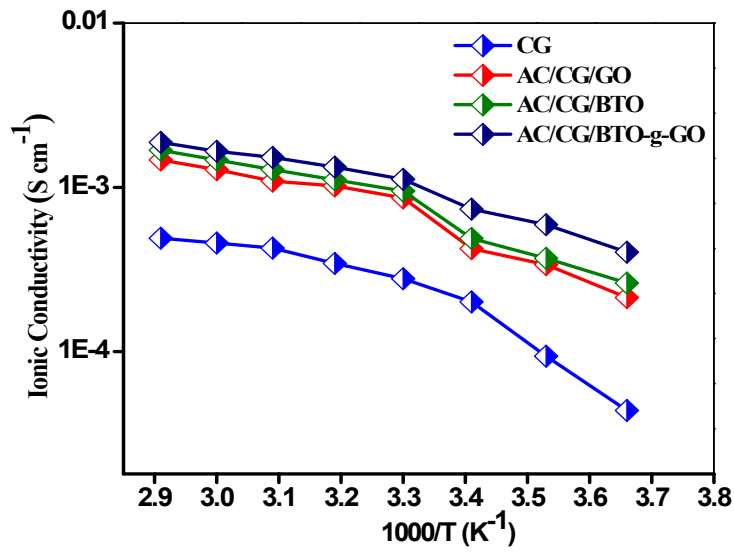

Figure SI 4. Variation of ionic conductivity as a function of inverse temperature.

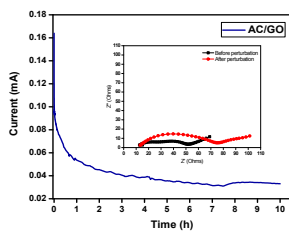

a  
)

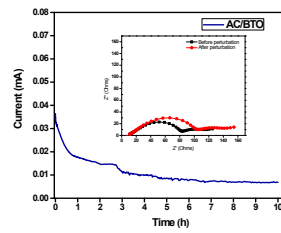

b  
)

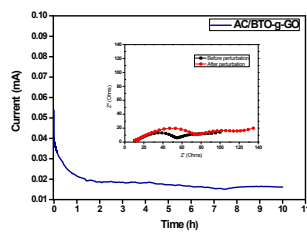

c  
)

Figure SI 5. Chronoamperometric curve for the Li-S cells with a) AC/ GO, b) AC/BTO and c) AC/ BTO-g-GO after perturbation. **Inset:** Impedance spectra of the cell before and after DC polarization at room temperature.

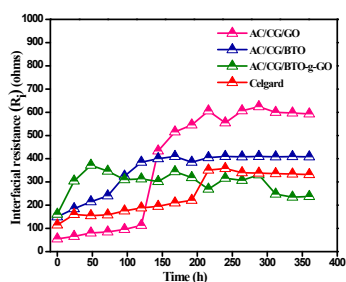

**Figure SI 6.** The variation of interfacial resistance as a function of time for Li/Separator/Li symmetric cells at room temperature.

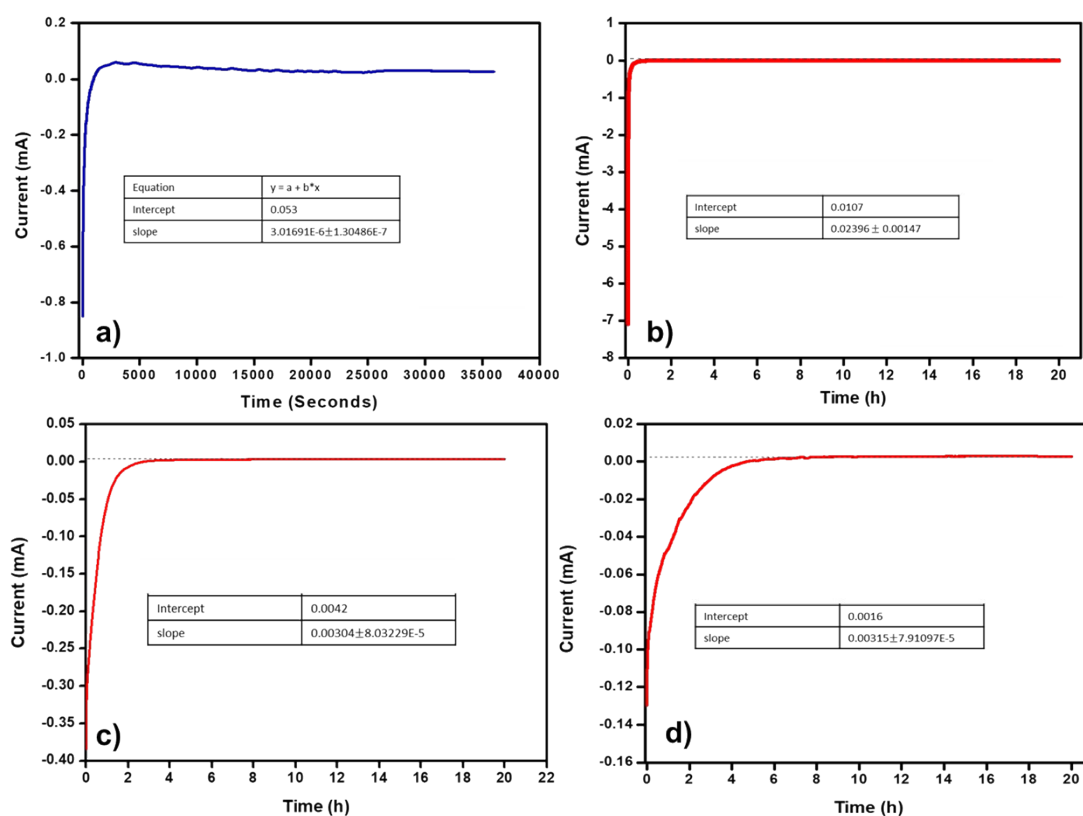

**Figure SI 7.** Current profile of Li-S cells with a) Celgard b) AC/GO c) AC/BTO d) AC/BTO-g-GO held at a constant potential of 2.3 V.

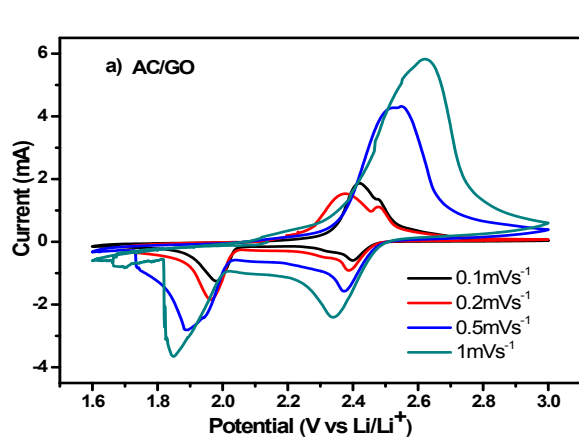

| Peak | Diffusion coefficient ( $\text{cm}^2\text{s}^{-1}$ ) |
|------|------------------------------------------------------|
| 2.4  | $5.1 \times 10^{-5}$                                 |
| 1.99 | $8.9 \times 10^{-5}$                                 |
| 2.4  | $3.02 \times 10^{-6}$                                |
| 2.48 | $2.04 \times 10^{-6}$                                |

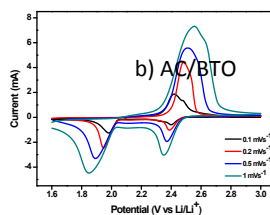

| Peak | Diffusion coefficient ( $\text{cm}^2\text{s}^{-1}$ ) |
|------|------------------------------------------------------|
| 2.4  | $9.3 \times 10^{-5}$                                 |
| 1.99 | $1.02 \times 10^{-6}$                                |
| 2.4  | $2.84 \times 10^{-6}$                                |
| 2.48 | $2.6 \times 10^{-6}$                                 |

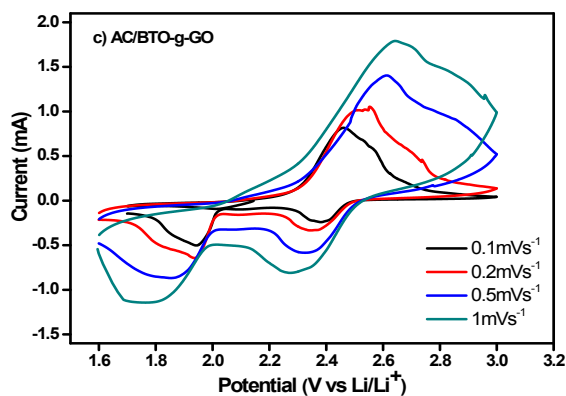

| Peak | Diffusion coefficient ( $\text{cm}^2\text{s}^{-1}$ ) |
|------|------------------------------------------------------|
| 2.4  | $5.31 \times 10^{-4}$                                |
| 1.99 | $6.28 \times 10^{-4}$                                |
| 2.4  | $1.47 \times 10^{-5}$                                |
| 2.48 | $1.17 \times 10^{-5}$                                |

**Figure SI 8.** The lithium-ion diffusion coefficients calculated for Li-S cells with a) AC/GO b) AC/BTO and d) AC/BTO-g-GO membranes.

Table 1. Comparison of permselective trilayer membranes properties with the present system

| Sl. No | Sulfur content (wt%) | Mass loading of S electrode (mg/cm <sup>2</sup> ) | Thickness of the coating layer (μm) | Mass of the coating layer (mg/cm <sup>2</sup> ) | Initial discharge capacity (mAh/g) | Reversible discharge capacity (mAh/g) | No. of cycles | C rate | Degradation rate per cycle (%) | Reference |
|--------|----------------------|---------------------------------------------------|-------------------------------------|-------------------------------------------------|------------------------------------|---------------------------------------|---------------|--------|--------------------------------|-----------|
| 1      | 75                   | 0.75                                              | 25                                  | 1.32                                            | 1067.7                             | 804.4                                 | 100           | 0.2 C  | 1.3                            | 2         |
| 2      | 80                   | 2.5 (areal loading)                               | 35                                  | 1                                               | 1110.4                             | 801.6                                 | 300           | 0.5    | NA                             | 3         |
| 3      | 60                   | 1.4                                               | 8                                   | 0.01                                            | 1020                               | 709                                   | 100           | 0.2    | 0.3                            | 4         |
| 4      | 63                   | 1.5                                               | 20                                  | 0.12                                            | 920                                | NA                                    | 100           | 0.1    | 0.49 to 0.23                   | 5         |
| 5      | 60                   | 1                                                 | 25                                  | 0.5                                             | 836                                | 610                                   | 200           | 0.1    | 0.1                            | 6         |
| 6      | 72                   | 0.72                                              | 47                                  | 0.8                                             | 1350                               | 620                                   | 100           | 0.1    | 2.20                           | 7         |
| 7      | 80                   | 1                                                 | NA                                  | NA                                              | 1045                               | 628                                   | 50            | 0.05   | 1.6                            | 8         |
| 8      | 42                   | 1                                                 | 42                                  | NA                                              | 1287                               | 807.8                                 | 100           | 0.2    | 1.60                           | 9         |
| 9      | 80                   | 0.7                                               | 20                                  | 0.825                                           | 1382                               | 924                                   | 200           | 0.1    | 1.4                            | 10        |
| 10     | 70                   | 1.7                                               | 35                                  | 0.9                                             | 1382                               | 1015                                  | 200           | 0.2    | 0.1                            | 11        |
| 11     | 70                   | 4                                                 | 25                                  | 0.8                                             | 1450                               | 833.3                                 | 100           | 0.1    | 0.6                            | 12        |

## Supporting References

- 1 S. Nayak, B. Sahoo, T. K. Chaki and D. Khastgir, *RSC Adv.*, 2014, **4**, 1212–1224.
- 2 R. Song, R. Fang, L. Wen, Y. Shi, S. Wang and F. Li, *J. Power Sources*, 2016, **301**, 179–186.
- 3 G. Ma, F. Huang, Z. Wen, Q. Wang, X. Hong, J. Jin and X. Wu, *J. Mater. Chem. A*, 2016, **4**, 16968–16974.
- 4 C. H. Chang, S. H. Chung and A. Manthiram, *J. Mater. Chem. A*, 2015, **3**, 18829–18834.
- 5 J. Q. Huang, T. Z. Zhuang, Q. Zhang, H. J. Peng, C. M. Chen and F. Wei, *ACS Nano*, 2015, **9**, 3002–3011.

- 6 H. Yao, K. Yan, W. Li, G. Zheng, D. Kong, Z. W. Seh, V. K. Narasimhan, Z. Liang and Y. Cui, *Energy Environ. Sci.*, 2014, **7**, 3381–3390.
- 7 M. Raja, S. Suriyakumar, N. Angulakshmi and A. Manuel Stephan, *Inorg. Chem. Front.*, 2017, **4**, 1013–1021.
- 8 X. Ou, Y. Yu, R. Wu, A. Tyagi, M. Zhuang, Y. Ding, I. H. Abidi, H. Wu, F. Wang and Z. Luo, *ACS Appl. Mater. Interfaces*, 2018, **10**, 5534–5542.
- 9 Q. Xu, G. C. Hu, H. L. Bi and H. F. Xiang, *Ionics (Kiel)*, 2015, **21**, 981–986.
- 10 W. Ahn, S. N. Lim, D. U. Lee, K. B. Kim, Z. Chen and S. H. Yeon, *J. Mater. Chem. A*, 2015, **3**, 9461–9467.
- 11 J. Balach, T. Jaumann, M. Klose, S. Oswald, J. Eckert and L. Giebeler, *J. Phys. Chem. C*, 2015, **119**, 4580–4587.
- 12 The present work.
